# Supplementary material
Source: publisher figshare collection journal article supplement (https://asha.figshare.com/articles/dataset/_/13158149)
Supplement: Supplementary file 2 [file 1]

## Supplemental Material S2. Excluded papers at the eligibility stage

| <b>Author (Date)</b>                                   | <b>Reason for exclusion</b>                                         |
|--------------------------------------------------------|---------------------------------------------------------------------|
| Abad (2007)                                            | No comparison group, only a CAS group                               |
| Adams (1998)                                           | Not CAS                                                             |
| Ahmed, Raja, Nuguid, and Al-Shmary (2012)              | No comparison group, only a CAS group                               |
| Ahmed, Raja, Nuguid, and Al-Shmary (2012)              | CAS only compared to typically developing children, not another SSD |
| Alcock, Passingham, Watkins, and Vargha-Khadem (2000)  | No comparison group, only a CAS group                               |
| Alcock, Passingham, Watkins, and Vargha-Khadem (2000)  | No comparison group, only a CAS group                               |
| Amato and Slavin (1998)                                | No comparison group, only a CAS group                               |
| Aplin (1987)                                           | Methodology not diagnostic or marker study                          |
| Aram and Horwitz (1983)                                | No comparison group, only a CAS group                               |
| Arroyo (2011)                                          | CAS only compared to typically developing children, not another SSD |
| Arvedson, Rudolph, and Kerschner (2004)                | No comparison group, only a CAS group                               |
| Ayres and Mailloux (1981)                              | No comparison group, only a CAS group                               |
| Ball (1999)                                            | No comparison group, only a CAS group                               |
| Ball, Bernthal, and Beukelman (2002)                   | No comparison group, only a CAS group                               |
| Basso and Scarpa (1990)                                | No comparison group, only a CAS group                               |
| Bat-El (2009)                                          | CAS only compared to typically developing children, not another SSD |
| Begeer, Haaxma, Snoek, Boonstra, and le Coultre (1986) | No comparison group, only a CAS group                               |
| Bellinger et al. (1999)                                | No comparison group, only a CAS group                               |

|                                                            |                                                                     |
|------------------------------------------------------------|---------------------------------------------------------------------|
| Belmonte et al. (2013)                                     | No comparison group, only a CAS group                               |
| Belton, Salmond, Watkins, Vargha-Khadem, and Gadian (2003) | No comparison group, only a CAS group                               |
| Benítez-Burraco (2008)                                     | No comparison group, only a CAS group                               |
| Berkovic and Scheffer (1997)                               | No comparison group, only a CAS group                               |
| Boni et al. (2006)                                         | No comparison group, only a CAS group                               |
| Boucher (2014)                                             | Not CAS                                                             |
| Boyar et al. (2001)                                        | Methodology not diagnostic or marker study                          |
| Braddock, Farmer, Deidrick, Iverson, and Maria (2006)      | No comparison group, only a CAS group                               |
| Bridgeman and Snowling (1988)                              | CAS only compared to typically developing children, not another SSD |
| Broomfield and Dodd (2004)                                 | Not CAS                                                             |
| Broussolle et al. (1996)                                   | No comparison group, only a CAS group                               |
| Brunner et al. (2007)                                      | No comparison group, only a CAS group                               |
| Carole Samango-Sprouse and Rogol (2002)                    | No comparison group, only an XXY group with suspected CAS           |
| Carr et al. (2010)                                         | No comparison group, only a CAS group                               |
| Caspari, Strand, Kotagal, and Bergqvist (2008)             | No comparison group, only a CAS group                               |
| Chéliout-Héraut, Picard, Bouskraoui, and Lacert (1999)     | CAS only compared to typically developing children, not another SSD |
| Chilosi et al. (2015)                                      | No comparison group, only a CAS group                               |
| Connaghan and Patel (2012)                                 | No comparison group, only a CAS group                               |
| Curie et al. (2014)                                        | Not CAS                                                             |
| Davis, Jacks, and Marquardt (2005)                         | No comparison group, only a CAS group                               |
| Davis, Jakielski, and Marquardt (1998)                     | No comparison group, only a CAS group                               |

|                                                                 |                                                                     |
|-----------------------------------------------------------------|---------------------------------------------------------------------|
| de Farias, de Avila, and Vieira (2006)                          | CAS only compared to typically developing children, not another SSD |
| De Oliveira, Neri, De Medeiros, Guimarães, and Guerreiro (2010) | No comparison group, only a CAS group                               |
| De Witte et al. (2017)                                          | No comparison group, only a CAS group                               |
| Demirci (2006)                                                  | No comparison group, only a CAS group                               |
| Dewaele, Bartolo, Macchi, and Cautillon (2015)                  | Not CAS                                                             |
| Dewey (1995)                                                    | Methodology not diagnostic or marker study                          |
| Dewey, Roy, Square-Storer, and Hayden (1988)                    | No comparison group, only a CAS group                               |
| Eising et al. (2018)                                            | No comparison group, only a CAS group                               |
| Ekelman and Aram (1983)                                         | No comparison group, only a CAS group                               |
| Estes and Hertz (2013)                                          | No comparison group, only a CAS group                               |
| Fabus (2006)                                                    | Not CAS                                                             |
| Fedorenko et al. (2016)                                         | No comparison group, only a CAS group                               |
| Ferry, Hall, and Hicks (1975)                                   | No comparison group, only a CAS group                               |
| Feuk et al. (2006)                                              | No comparison group, only a CAS group                               |
| Froud and Khamis-Dakwar (2012)                                  | CAS only compared to typically developing children, not another SSD |
| Gizzonio et al. (2015)                                          | No comparison group, only a CAS group                               |
| Green, Wilson, Wang, and Moore (2007)                           | Not CAS                                                             |
| Grigos (2005)                                                   | Dissertation with same data as published article.                   |
| Grigos and Case (2018)                                          | CAS only compared to typically developing children, not another SSD |
| Grigos and Kolenda (2010)                                       | CAS only compared to typically developing children, not another SSD |
| Grigos, Moss, and Lu (2015)                                     | CAS only compared to typically developing children, not another SSD |

|                                                             |                                                                     |
|-------------------------------------------------------------|---------------------------------------------------------------------|
| Grigos, Saxman, and Gordon (2005)                           | Not CAS                                                             |
| Groenen, Maassen, and Crul (1998)                           | CAS only compared to typically developing children, not another SSD |
| Groenen, Maassen, Crul, and Thoonen (1996)                  | CAS only compared to typically developing children, not another SSD |
| Gubbay (1978)                                               | No comparison group, only a CAS group                               |
| Hage (1999)                                                 | No comparison group, only a CAS group                               |
| Hall et al. (1986)                                          | No comparison group, only a CAS group                               |
| Hansen et al. (1996)                                        | No comparison group, only a CAS group                               |
| Hermansen, Jensen, and Ibsen (1985)                         | Methodology not diagnostic or marker study                          |
| Highman, Hennessey, Leitao, and Piek (2013)                 | CAS only compared to typically developing children, not another SSD |
| Highman, Hennessey, Sherwood, and Leitao (2008)             | Not CAS                                                             |
| Highman, Leitao, Hennessey, and Piek (2012)                 | CAS only compared to typically developing children, not another SSD |
| Horwitz (1984)                                              | Methodology not diagnostic or marker study                          |
| Hosom, Shriberg, and Green (2004)                           | No comparison group, only a CAS group                               |
| Huber-Okraïneç, Dennis, Brettschneider, and Spiegler (2002) | No comparison group, only a CAS group                               |
| Ingram (2015)                                               | CAS only compared to typically developing children, not another SSD |
| Jacks, Marquardt, and Davis (2006)                          | No comparison group, only a CAS group                               |
| Kadis et al. (2014)                                         | CAS only compared to typically developing children, not another SSD |
| Karlov, Dondovyn, and Gnezditsky (2004)                     | No comparison group, only a CAS group                               |
| King, Jones, and Lasky (1982)                               | No comparison group, only a CAS group                               |
| Kummer, Lee, Stutz, Maroney, and Brandt (2007)              | CAS only compared to typically developing children, not another SSD |
| Laffin et al. (2012)                                        | No comparison group, only a CAS group                               |

|                                                    |                                                                     |
|----------------------------------------------------|---------------------------------------------------------------------|
| Le Normand and Chevrie-Muller (1991)               | No comparison group, only a CAS group                               |
| Le Normand, Vaivre-Douret, Payan, and Cohen (2000) | No comparison group, only a CAS group                               |
| Le Normand, Vinter, and Konopczynski (1993)        | No comparison group, only a CAS group                               |
| Lemkes (2010)                                      | CAS only compared to typically developing children, not another SSD |
| Lennon et al. (2007)                               | No comparison group, only a CAS group                               |
| Lewis and Freebairn (1997)                         | No comparison group, only a CAS group                               |
| Lewis et al. (2011)                                | No comparison group, only a CAS group                               |
| Maassen, Groenen, and Crul (2003)                  | CAS only compared to typically developing children, not another SSD |
| Maassen, Nijland, and van der Meulen (2001)        | No comparison group, only a CAS group                               |
| MacDermot et al. (2005)                            | No comparison group, only a CAS group                               |
| Marien et al. (2008)                               | No comparison group, only a CAS group                               |
| Marignier et al. (2012)                            | No comparison group, only a CAS group                               |
| Marion, Sussman, and Marquardt (1993)              | No comparison group, only a CAS group                               |
| Marquardt, Jacks, and Davis (2004)                 | No comparison group, only a CAS group                               |
| Marquardt, Sussman, Snow, and Jacks (2002)         | No comparison group, only a CAS group                               |
| McCabe, Rosenthal, and McLeod (1998)               | No comparison group, only a CAS group                               |
| McCormick (2000)                                   | Methodology not diagnostic or marker study                          |
| McLaughlin and Kriegsmann (1980)                   | No comparison group, only a CAS group                               |
| McNeill (2015)                                     | No comparison group, only a CAS group                               |
| McNeill and Gillon (2013)                          | No comparison group, only a CAS group                               |
| Milloy and Summers (1989)                          | No comparison group, only a CAS group                               |

|                                                     |                                                                     |
|-----------------------------------------------------|---------------------------------------------------------------------|
| Mills, Gosling, and Sell (2006)                     | No comparison group, only a CAS group                               |
| Murdoch, Attard, Ozanne, and Stokes (1995)          | CAS only compared to typically developing children, not another SSD |
| Murray, Thomas, and McKechnie (2018)                | No comparison group, only a CAS group                               |
| Namasivayam et al. (2013)                           | Not CAS                                                             |
| Nelson, Waggoner, Donnell, Tuerck, and Buist (1991) | No comparison group, only a CAS group                               |
| Newmeyer et al. (2009)                              | No comparison group, only a CAS group                               |
| Nijland, Maassen, and Der Meulen (2003)             | CAS only compared to typically developing children, not another SSD |
| Nijland, Maassen, and van der Meulen (2002)         | CAS only compared to typically developing children, not another SSD |
| Nijland, Terband, and Maassen (2015)                | CAS only compared to typically developing children, not another SSD |
| Nikoghosyan-Bossen (2018)                           | No comparison group, only a CAS group                               |
| Northam et al. (2012)                               | Not CAS                                                             |
| Odell and Shriberg (2001)                           | No comparison group, only a CAS group                               |
| Otten and Walther (2012)                            | No comparison group, only a CAS group                               |
| Overby and Caspari (2015)                           | CAS only compared to typically developing children, not another SSD |
| Pal (2011)                                          | No comparison group, only a CAS group                               |
| Pal, Li, Clarke, Lieberman, and Strug (2010)        | No comparison group, only a CAS group                               |
| Palka et al. (2012)                                 | No comparison group, only a CAS group                               |
| Park and Byeon (2015)                               | CAS only compared to typically developing children, not another SSD |
| Patel and Connaghan (2014)                          | No comparison group, only a CAS group                               |
| Peter (2012)                                        | Not CAS                                                             |
| Peter and Raskind (2011)                            | No comparison group, only a CAS group                               |

|                                                          |                                                                     |
|----------------------------------------------------------|---------------------------------------------------------------------|
| Peter and Stoel-Gammon (2005)                            | CAS only compared to typically developing children, not another SSD |
| Peter and Stoel-Gammon (2008)                            | CAS only compared to typically developing children, not another SSD |
| Peter et al. (2016)                                      | No comparison group, only a CAS group                               |
| Peter, Button, Stoel-Gammon, Chapman, and Raskind (2013) | No comparison group, only a CAS group                               |
| Peter, Matsushita, Oda, and Raskind (2014)               | No comparison group, only a CAS group                               |
| Pierpont et al. (2010)                                   | No comparison group, only a CAS group                               |
| Polan et al. (2014)                                      | No comparison group, only a CAS group                               |
| Polivara (2015)                                          | No comparison group, only a CAS group                               |
| Pollock and Hall (1991)                                  | No comparison group, only a CAS group                               |
| Poretti et al. (2014)                                    | No comparison group, only a CAS group                               |
| Posod (2013)                                             | No comparison group, only a CAS group                               |
| Prater et al. (2012)                                     | No comparison group, only a CAS group                               |
| Preston et al. (2014)                                    | CAS only compared to typically developing children, not another SSD |
| Rabin, Millan, Cabrera-Luque, and Pappas (2018)          | No comparison group, only a CAS group                               |
| Raca et al. (2013)                                       | No comparison group, only a CAS group                               |
| Rasmussen, Andreassen, Stromme, and Hansen (1996)        | No comparison group, only a CAS group                               |
| Redle et al. (2015)                                      | Not CAS                                                             |
| Robertson, Singh, Guerrero, Hundley, and Elsas (2000)    | No comparison group, only a CAS group                               |
| Rosenbek (1980)                                          | Methodology not diagnostic or marker study                          |
| Rosenbek and Wertz (1972)                                | No comparison group, only a CAS group                               |
| Samango-Sprouse et al. (2016)                            | No comparison group, only a CAS group                               |

|                                                          |                                                                                 |
|----------------------------------------------------------|---------------------------------------------------------------------------------|
| Scheffer et al. (1995)                                   | No comparison group, only a CAS group                                           |
| Schumacher, Strand, and Augustyn (2015)                  | No comparison group, only a CAS group                                           |
| Sealey and Giddens (2010)                                | CAS only compared to typically developing children, not another SSD             |
| Sengoku, Kanazawa, Fujitake, Kawai, and Yamaguchi (1985) | No comparison group, only a CAS group                                           |
| Shahin et al. (2015)                                     | No comparison group, only a CAS group                                           |
| Shelton (2002)                                           | No comparison group, only a CAS group                                           |
| Shriberg (2012)                                          | Methodology not diagnostic or marker study                                      |
| Shriberg et al. (1997c)                                  | Methodology not diagnostic or marker study – results in Shriberg et al. (1997b) |
| Shriberg et al. (2006)                                   | No comparison group, only a CAS group                                           |
| Shriberg et al. (2010)                                   | Methodology not diagnostic or marker study                                      |
| Smith (2004)                                             | CAS only compared to typically developing children, not another SSD             |
| Snowling and Stackhouse (1983)                           | CAS only compared to typically developing children, not another SSD             |
| Soblet et al. (2018)                                     | No comparison group, only a CAS group                                           |
| Sorensen (1997)                                          | No comparison group, only a CAS group                                           |
| Speirs and Dean (1989)                                   | CAS only compared to typically developing children, not another SSD             |
| Spinelli, Rocha, Giacheti, and Richieri-Costa (1995)     | No comparison group, only a CAS group                                           |
| Stackhouse (1992)                                        | No comparison group, only a CAS group                                           |
| Stackhouse and Snowling (1992)                           | CAS only compared to typically developing children, not another SSD             |
| Sussman, Marquardt, and Doyle (2000)                     | CAS only compared to typically developing children, not another SSD             |
| Sussman, Marquardt, Doyle, and Knapp (2002)              | CAS only compared to typically developing children, not another SSD             |
| Tate (1990)                                              | No comparison group, only a CAS group                                           |

|                                                                  |                                                                     |
|------------------------------------------------------------------|---------------------------------------------------------------------|
| Terband, van Brenk, and van Doornik-van der Zee (2014)           | Not CAS                                                             |
| Thevenon et al. (2013)                                           | No comparison group, only a CAS group                               |
| Thomas (2014)                                                    | CAS only compared to typically developing children, not another SSD |
| Thoonen and et al. (1994)                                        | CAS only compared to typically developing children, not another SSD |
| Thoonen, Maassen, Gabreëls, Schreuder, and De Swart (1997)       | CAS only compared to typically developing children, not another SSD |
| Tierney et al. (2015)                                            | No comparison group, only a CAS group                               |
| Togram (2015)                                                    | No comparison group, only a CAS group                               |
| Tubul-Lavy (2012)                                                | No comparison group, only a CAS group                               |
| Tükel, Björelilius, Henningsson, McAllister, and Eliasson (2015) | No comparison group, only a CAS group                               |
| Turner et al. (2013)                                             | No comparison group, only a CAS group                               |
| van der Merwe, Uys, Loots, Grimbeek, and Jansen (1989)           | No comparison group, only a CAS group                               |
| Van Uden (1981)                                                  | Methodology not diagnostic or marker study                          |
| Vargas and Narbona (2002)                                        | No comparison group, only a CAS group                               |
| Vernes et al. (2006)                                             | No comparison group, only a CAS group                               |
| Vernes, MacDermot, Monaco, and Fisher (2009)                     | No comparison group, only a CAS group                               |
| Vose (2018)                                                      | CAS only compared to typically developing children, not another SSD |
| Waisbren et al. (2012)                                           | Adults not children                                                 |
| Walton and Pollock (1993)                                        | No comparison group, only a CAS group                               |
| Watkins, Dronkers, and Vargha-Khadem (2002)                      | No comparison group, only a CAS group                               |
| Watkins, Vargha-Khadem, et al. (2002)                            | No comparison group, only a CAS group                               |
| Weistuch and Schiff-Myers (1996)                                 | No comparison group, only a CAS group                               |

|                                                          |                                                                     |
|----------------------------------------------------------|---------------------------------------------------------------------|
| Wertzner, Pagan-Neves, Alves, and Barrozo (2013)         | CAS only compared to typically developing children, not another SSD |
| Whaley (1985)                                            | Not CAS                                                             |
| Wiley, Choo, Meinzen-Derr, Hilbert, and Greinwald (2006) | No comparison group, only a CAS group                               |
| Wilson and Dyson (1982)                                  | No comparison group, only a CAS group                               |
| Worthey et al. (2013)                                    | No comparison group, only a CAS group                               |
| Zerem et al. (2011)                                      | No comparison group, only a CAS group                               |

## References

- Abad, V. M. (2007). *Apraxia of speech (AOS) and specific reading disability in elementary grade students*. Dissertation retrieved from Linguistics and Language Behavior Abstracts (LLBA) database.
- Adams, L. (1998). Oral-Motor and Motor-Speech Characteristics of Children with Autism. *Focus on Autism and Other Developmental Disabilities, 13*(2), 108-112.
- Ahmed, B., Raja, F. A., Nuguid, E. D., & Al-Shmary, S. (2012). *Using temporal tracking measures to characterize speech of children with childhood apraxia of speech*. Paper presented at the Proceedings of the IASTED International Conference on Assistive Technologies, AT 2012.
- Ahmed, B., Raja, F. A., Nuguid, E. D., & Al-Shmary, S. (2012). *Using temporal tracking measures to characterize speech of children with childhood apraxia of speech*. Paper presented at the Proceedings of the IASTED International Conference on Assistive Technologies, AT 2012.
- Alcock, K. J., Passingham, R. E., Watkins, K., & Vargha-Khadem, F. (2000). Pitch and timing abilities in inherited speech and language impairment. *Brain and Language, 75*(1), 34-46.
- Alcock, K. J., Passingham, R. E., Watkins, K. E., & Vargha-Khadem, F. (2000). Oral dyspraxia in inherited speech and language impairment and acquired dysphasia. *Brain and Language, 75*(1), 17-33.
- Amato, J., Jr., & Slavin, D. (1998). A Preliminary Investigation of Oromotor Function in Young Verbal and Nonverbal Children with Autism. *Infant-Toddler Intervention, 8*(2), 175-184.
- Aplin, D. Y. (1987). Classification of dyspraxia in hearing-impaired children using the Q-technique of factor analysis. *Journal of Child Psychology & Psychiatry & Allied Disciplines, 28*(4), 581-596.
- Aram, D. M., & Horwitz, S. J. (1983). Sequential and Non-speech Praxic Abilities in Developmental Verbal Apraxia. *Developmental Medicine & Child Neurology, 25*(2), 197-206.
- Arroyo, C. G. (2011). Do co-occurrence patterns observed in babbling and early speech production persist in children with developmental apraxia of speech? *Dissertation Abstracts International: Section B: The Sciences and Engineering, 72*(4-B), 2069.
- Arvedson, J. C., Rudolph, C. D., & Kerschner, J. E. (2004). Klippel-Feil Syndrome with Multiple Cranial Nerve Deficits: Impact on Swallowing and Speech. *Journal of Medical Speech-Language Pathology, 12*(3), xli-xlvi.
- Ayres, A. J., & Mailloux, Z. (1981). Influence of sensory integration procedures on language development (aphasia, apraxia, vestibular disorder). *American Journal of Occupational Therapy, 35*(6), 383-390.
- Ball, L. J. (1999). *Communication Characteristics of Children with Developmental Apraxia of Speech*. Doctoral dissertation, The University of Nebraska. Retrieved from Linguistics and Language Behavior Abstracts (LLBA) database.
- Ball, L. J., Bernthal, J. E., & Beukelman, D. R. (2002). Profiling Communication Characteristics of Children with Developmental Apraxia of Speech. *Journal of Medical Speech-Language Pathology, 10*(4), 221-229.
- Basso, A., & Scarpa, M. (1990). Traumatic aphasia in children and adults: A comparison of clinical features and evolution. *Cortex: A Journal Devoted to the Study of the Nervous System and Behavior, 26*(4), 502-514.

- Bat-El, O. (2009). Harmonic domains and synchronization in typically and atypically developing Hebrew-speaking children. *Language Sciences*, *31*(2-3), 117-135.
- Begeer, J. H., Haaxma, R., Snoek, J. W., Boonstra, S., & le Coultre, R. (1986). Signs of focal posterior cerebral abnormality in early subacute sclerosing panencephalitis. *Annals of Neurology*, *19*(2), 200-202.
- Bellinger, D. C., Wypij, D., Kuban, K. C. K., Rappaport, L. A., Hickey, P. R., Wernovsky, G., . . . Newburger, J. W. (1999). Developmental and neurological status of children at 4 years of age after heart surgery with hypothermic circulatory arrest or low-flow cardiopulmonary bypass. *Circulation*, *100*(5), 526-532.
- Belmonte, M. K., Saxena-Chandhok, T., Cherian, R., Muneer, R., George, L., & Karanth, P. (2013). Oral motor deficits in speech-impaired children with autism. *Frontiers in Integrative Neuroscience*, *7*, 47.
- Belton, E., Salmond, C. H., Watkins, K. E., Vargha-Khadem, F., & Gadian, D. G. (2003). Bilateral brain abnormalities associated with dominantly inherited verbal and orofacial dyspraxia. *Human Brain Mapping*, *18*(3), 194-200.
- Benítez-Burraco, A. (2008). FOXP2 and the molecular biology of language: New evidence. I. Phenotypic aspects and animal models. *Revista de Neurologia*, *46*(5), 289-298.
- Berkovic, S. F., & Scheffer, I. E. (1997). Epilepsies with single gene inheritance. *Brain and Development*, *19*(1), 13-18.
- Boni, A., Filippini, M., Masina, F., Cacudi, M., Pini, A., Visconti, P., . . . Gobbi, G. (2006). Rolandic spikes and cognitive disorders: A multidimensional approach to a complex case. *Bollettino - Lega Italiana contro l'Epilessia*(133-134), 25-26.
- Boucher, M. J. (2014). Evaluation of motor speech and intervention planning for children with autism. *Dissertation Abstracts International: Section B: The Sciences and Engineering*, *74*(11-B(E)), No Pagination Specified.
- Boyar, F. Z., Whitney, M. M., Lossie, A. C., Gray, B. A., Keller, K. L., Stalker, H. J., . . . Driscoll, D. J. (2001). A family with a grand-maternally derived interstitial duplication of proximal 15q. *Clinical Genetics*, *60*(6), 421-430.
- Braddock, B. A., Farmer, J. E., Deidrick, K. M., Iverson, J. M., & Maria, B. L. (2006). Oromotor and communication findings in joubert syndrome: further evidence of multisystem apraxia. *Journal of Child Neurology*, *21*(2), 160-163.
- Bridgeman, E., & Snowling, M. (1988). The Perception of Phoneme Sequence: A Comparison of Dyspraxic and Normal Children. *The British Journal of Disorders of Communication*, *23*(3), 245-252.
- Broomfield, J., & Dodd, B. (2004). The Nature of Referred Subtypes of Primary Speech Disability. *Child Language Teaching and Therapy*, *20*(2), 135-151.
- Broussolle, E., Bakchine, S., Tommasi, M., Laurent, B., Bazin, B., Cinotti, L., . . . Chazot, G. (1996). Slowly progressive anarthria with late anterior opercular syndrome: a variant form of frontal cortical atrophy syndromes. *Journal of the Neurological Sciences*, *144*(1-2), 44-58.
- Brunner, M., Dockter, S., Feldhusen, F., Pröschel, U., Plinkert, P., Komposch, G., & Müssig, E. (2007). Different patterns of velopharyngeal dysfunction in cleft palate patients. *HNO*, *55*(11), 851-857.
- Carr, C. W., Moreno-De-Luca, D., Parker, C., Zimmerman, H. H., Ledbetter, N., Martin, C. L., . . . Abdul-Rahman, O. A. (2010). Chiari I malformation, delayed gross motor skills,

- severe speech delay, and epileptiform discharges in a child with FOXP1 haploinsufficiency. *European Journal of Human Genetics*, 18(11), 1216-1220.
- Caspari, S. S., Strand, E. A., Kotagal, S., & Bergqvist, C. (2008). Obstructive sleep apnea, seizures, and childhood apraxia of speech. *Pediatric Neurology*, 38(6), 422-425.
- Chéliout-Hérait, F., Picard, A., Bouskraoui, M., & Lacert, P. (1999). Sleep disorders and developmental dysphasias. *Neurophysiologie Clinique*, 29(3), 277-289.
- Chilosi, A. M., Lorenzini, I., Fiori, S., Graziosi, V., Rossi, G., Pasquariello, R., . . . Cioni, G. (2015). Behavioral and neurobiological correlates of childhood apraxia of speech in Italian children. *Brain & Language*, 150, 177-185.
- Connaghan, K., & Patel, R. (2012). Impact of Prosodic Strategies on Vowel Intelligibility in Childhood Motor Speech Impairment. *Journal of Medical Speech-Language Pathology*, 20(4), 133-139.
- Curie, A., Nazir, T., Brun, A., Paulignan, Y., Reboul, A., Delange, K., . . . Des Portes, V. (2014). The c.429-452 duplication of the ARX gene: A unique developmental-model of limb kinetic apraxia. *Orphanet Journal of Rare Diseases*, 9(1).
- Davis, B. L., Jacks, A., & Marquardt, T. P. (2005). Vowel Patterns in Developmental Apraxia of Speech: Three Longitudinal Case Studies. *Clinical Linguistics & Phonetics*, 19(4), 249-274.
- Davis, B. L., Jakielski, K. J., & Marquardt, T. P. (1998). Developmental apraxia of speech: determiners of differential diagnosis. *Clinical Linguistics & Phonetics*, 12(1), 25-45.
- de Farias, S. R., de Avila, C. R., & Vieira, M. M. (2006). [Relationship between speech, tonus and non-verbal praxis of the stomatognathic system in preschoolers]. *Profono*, 18(3), 267-276.
- De Oliveira, E. P. D. M., Neri, M. L., De Medeiros, L. L., Guimarães, C. A., & Guerreiro, M. M. (2010). School performance and praxis assessment in children with rolandic epilepsy. *Pro-Fono*, 22(3), 209-214.
- De Witte, E., Wilssens, I., De Surgeloose, D., Dua, G., Moens, M., Verhoeven, J., . . . Marien, P. (2017). Apraxia of speech and cerebellar mutism syndrome: a case report. *Cerebellum & Ataxias*, 4, 2.
- Demirci, S. (2006). A selective ideational apraxic agraphia for consonants. *Turkish Journal of Medical Sciences*, 36(4), 243-246.
- Dewaele, J., Bartolo, A., Macchi, L., & Cautillon, M. E. (2015). Relationship between limb dyspraxia and dyslexia in children with learning disabilities. *Psychologie Française*, 60(3), 285-300.
- Dewey, D. (1995). What is developmental dyspraxia? *Brain and Cognition*, 29(3), 254-274.
- Dewey, D., Roy, E. A., Square-Storer, P. A., & Hayden, D. C. (1988). Limb and oral praxic abilities of children with verbal sequencing deficits. *Developmental Medicine & Child Neurology*, 30(6), 743-751.
- Eising, E., Carrion-Castillo, A., Vino, A., Strand, E. A., Jakielski, K. J., Scerri, T. S., . . . Fisher, S. E. (2018). A set of regulatory genes co-expressed in embryonic human brain is implicated in disrupted speech development. *Molecular Psychiatry*, 1-14.
- Ekelman, B. L., & Aram, D. M. (1983). Syntactic Findings in Developmental Verbal Apraxia. *Journal of Communication Disorders*, 16(4), 237-250.
- Estes, B. W., & Hertz, J. B. (2013). A case study: Developmental coordination disorder and developmental dyspraxia. In *Psychopathology of childhood and adolescence: A*

- neuropsychological approach* (pp. 200-206). New York, NY: Springer Publishing Co; US.
- Fabus, R. L. (2006). *Evaluating the procedural deficit hypothesis: Language and motor deficits in preschool children*. Doctoral Dissertation. Retrieved from Linguistics and Language Behavior Abstracts (LLBA) database.
- Fedorenko, E., Morgan, A., Murray, E., Cardinaux, A., Mei, C., Tager-Flusberg, H., . . . Kanwisher, N. (2016). A highly penetrant form of childhood apraxia of speech due to deletion of 16p11.2. *European Journal of Human Genetics*, *24*(2), 302-306.
- Ferry, P. C., Hall, S. M., & Hicks, J. L. (1975). "Dilapidated" speech: Developmental verbal dyspraxia. *Developmental Medicine & Child Neurology*, *17*(6), 749-756.
- Feuk, L., Kalervo, A., Lipsanen-Nyman, M., Skaug, J., Nakabayashi, K., Finucane, B., . . . Hannula-Jouppi, K. (2006). Absence of a paternally inherited FOXP2 gene in developmental verbal dyspraxia. *American Journal of Human Genetics*, *79*(5), 965-972.
- Froud, K., & Khamis-Dakwar, R. (2012). Mismatch negativity response in children with a diagnosis of childhood apraxia of speech (CAS). *American Journal of Speech-Language Pathology*, *21*(4), 302-312.
- Gizzonio, V., Avanzini, P., Campi, C., Orivoli, S., Piccolo, B., Cantalupo, G., . . . Fabbri-Destro, M. (2015). Failure in Pantomime Action Execution Correlates with the Severity of Social Behavior Deficits in Children with Autism: A Praxis Study. *Journal of Autism and Developmental Disorders*, *45*(10), 3085-3097.
- Green, J. R., Wilson, E. M., Wang, Y.-T., & Moore, C. A. (2007). Estimating Mandibular Motion Based on Chin Surface Targets During Speech. *Journal of Speech, Language, and Hearing Research*, *50*(4), 928-939.
- Grigos, M. I. (2005). *Speech Motor Control during Acquisition of the Voicing Contrast*. Doctoral Dissertation, Columbia University. Retrieved from Linguistics and Language Behavior Abstracts (LLBA) database.
- Grigos, M. I., & Case, J. (2018). Changes in movement transitions across a practice period in childhood apraxia of speech. *Clinical Linguistics and Phonetics*, *32*(7), 661-687.
- Grigos, M. I., & Kolenda, N. (2010). The relationship between articulatory control and improved phonemic accuracy in childhood apraxia of speech: A longitudinal case study. *Clinical Linguistics & Phonetics*, *24*(1), 17-40.
- Grigos, M. I., Moss, A., & Lu, Y. (2015). Oral Articulatory Control in Childhood Apraxia of Speech. *Journal of Speech, Language, and Hearing Research*, *58*(4), 1103-1118.
- Grigos, M. I., Saxman, J. H., & Gordon, A. M. (2005). Speech Motor Development during Acquisition of the Voicing Contrast. *Journal of Speech, Language, and Hearing Research*, *48*(4), 739-752.
- Groenen, P., Maassen, B., & Crul, T. (1998). Formant transition duration and place perception in misarticulating children and adolescents. *Clinical Linguistics and Phonetics*, *12*(6), 439-457.
- Groenen, P., Maassen, B., Crul, T., & Thoonen, G. (1996). The Specific Relation Between Perception and Production Errors for Place of Articulation in Developmental Apraxia of Speech. *Journal of Speech and Hearing Research*, *39*(3), 468-482.
- Gubbay, S. S. (1978). The Management of Developmental Apraxia. *Developmental Medicine and Child Neurology*, *20*(5), 643-646.
- Hage, S. R. d. V. (1999). Alterations of Language in Children with Verbal Dyspraxia. [Alteracoes de linguagem em crianças com dispraxia verbal]. *Mimesis*, *20*(1), 77-87.

- Hall, P. K., et al. (1986). *The Presence of Word-Retrieval Deficits in Developmental Verbal Apraxia*. Paper presented at the American Speech-Language-Hearing Association Convention. Retrieved from ERIC: <https://files.eric.ed.gov/fulltext/ED288283.pdf>
- Hansen, T. W. R., Henrichsen, B., Rasmussen, R. K., Carling, A., Andreassen, A. B., & Skjeldal, O. (1996). Neuropsychological and linguistic follow-up studies of children with galactosaemia from an unscreened population. *Acta Paediatrica, International Journal of Paediatrics*, 85(10), 1197-1201.
- Hermansen, A., Jensen, H. R., & Ibsen, K. K. (1985). On Children with Defective Speech. *International Journal of Rehabilitation Research/Internationale Zeitschrift fur Rehabilitationsforschung/Revue Internationale de Recherches de Readaptation*, 8(2), 203-207.
- Highman, C., Hennessey, N., Sherwood, M., & Leitao, S. (2008). Retrospective parent report of early vocal behaviours in children with suspected Childhood Apraxia of Speech (sCAS). *Child Language Teaching and Therapy*, 24(3), 285-306.
- Highman, C., Hennessey, N. W., Leitao, S., & Piek, J. P. (2013). Early development in infants at risk of childhood apraxia of speech: a longitudinal investigation. *Developmental Neuropsychology*, 38(3), 197-210.
- Highman, C., Leitao, S., Hennessey, N., & Piek, J. (2012). Prelinguistic communication development in children with childhood apraxia of speech: A retrospective analysis. *International Journal of Speech-Language Pathology*, 14(1), 35-47.
- Horwitz, S. J. (1984). Neurological findings in developmental verbal apraxia. *Seminars in Speech and Language*, 5(2), 111-118.
- Hosom, J. P., Shriberg, L., & Green, J. R. (2004). Diagnostic assessment of childhood apraxia of speech using automatic speech recognition (ASR) methods. *Journal of Medical Speech-Language Pathology*, 12(4), 167-171.
- Huber-Okraïnec, J., Dennis, M., Brettschneider, J., & Spiegler, B. J. (2002). Neuromotor speech deficits in children and adults with spina bifida and hydrocephalus. *Brain & Language*, 80(3), 592-602.
- Ingram, S. B. (2015). Discrimination of duration differences of typically developing children and children with suspected childhood apraxia of speech. *Dissertation Abstracts International: Section B: The Sciences and Engineering*, 76(6-B(E)), No Pagination Specified.
- Jacks, A., Marquardt, T. P., & Davis, B. L. (2006). Consonant and Syllable Structure Patterns in Childhood Apraxia of Speech: Developmental Change in Three Children. *Journal of Communication Disorders*, 39(6), 424-441.
- Kadis, D. S., Goshulak, D., Namasivayam, A., Pukonen, M., Kroll, R., De Nil, L. F., . . . Lerch, J. P. (2014). Cortical thickness in children receiving intensive therapy for idiopathic apraxia of speech. *Brain Topography*, 27(2), 240-247.
- Karlov, V. A., Dondovyn, B., & Gnezditsky, V. V. (2004). Bifocal atypical rolandic epilepsy with speech dyspraxia. *Zhurnal Nevrologii i Psichiatrii imeni S.S. Korsakova*, 104(12), 4-9.
- King, R. R., Jones, C., & Lasky, E. (1982). In Retrospect: A Fifteen-Year Follow-Up Report of Speech-Language-Disordered Children. *Language, Speech, and Hearing Services in Schools*, 13(1), 24-32.

- Kummer, A. W., Lee, L., Stutz, L. S., Maroney, A., & Brandt, J. W. (2007). The prevalence of apraxia characteristics in patients with velocardiofacial syndrome as compared with other cleft populations. *Cleft Palate-Craniofacial Journal*, *44*(2), 175-181.
- Laffin, J. J. S., Raca, G., Jackson, C. A., Strand, E. A., Jakielski, K. J., & Shriberg, L. D. (2012). Novel candidate genes and regions for childhood apraxia of speech identified by array comparative genomic hybridization. *Genetics in Medicine*, *14*(11), 928-936.
- Le Normand, M. T., & Chevrie-Muller, C. (1991). A follow-up case study of transitory developmental apraxia of speech: 'L'enfant à voyelles'. *Clinical Linguistics & Phonetics*, *5*(2), 99-118.
- Le Normand, M. T., Vaivre-Douret, L., Payan, C., & Cohen, H. (2000). Neuromotor Development and Language Processing in Developmental Dyspraxia: A Follow-Up Case Study. *Journal of Clinical and Experimental Neuropsychology*, *22*(3), 408-417.
- Le Normand, M. T., Vinter, S., & Konopczynski, G. (1993). Early language development in children with consonant apraxia of speech: Two case studies case report. *Logopedics Phoniatrics Vocology*, *18*(4), 181-186.
- Lemkes, J. M. (2010). *Speech production analyses: Characterizing typical development versus childhood apraxia of speech*. (AAI1476599), Dissertation retrieved from Linguistics and Language Behavior Abstracts (LLBA) database.
- Lennon, P. A., Cooper, M. L., Peiffer, D. A., Gunderson, K. L., Patel, A., Peters, S., . . . Bacino, C. A. (2007). Deletion of 7q31.1 supports involvement of FOXP2 in language impairment: Clinical report and review. *American Journal of Medical Genetics, Part A*, *143*(8), 791-798.
- Lewis, B. A., Avrich, A. A., Freebairn, L. A., Hansen, A. J., Sucheston, L. E., Kuo, I., . . . Stein, C. M. (2011). Literacy Outcomes of Children With Early Childhood Speech Sound Disorders: Impact of Endophenotypes. *Journal of Speech, Language, and Hearing Research*, *54*(6), 1628-1643.
- Lewis, B. A., & Freebairn, L. (1997). Subgrouping Children with Familial Phonologic Disorders. *Journal of Communication Disorders*, *30*(5), 385-402.
- Maassen, B., Groenen, P., & Crul, T. (2003). Auditory and Phonetic Perception of Vowels in Children with Apraxic Speech Disorders. *Clinical Linguistics & Phonetics*, *17*(6), 447-467.
- Maassen, B., Nijland, L., & van der Meulen, S. (2001). Coarticulation within and between syllables by children with developmental apraxia of speech. *Clinical Linguistics and Phonetics*, *15*(1-2), 145-150.
- MacDermot, K. D., Bonora, E., Sykes, N., Coupe, A. M., Lai, C. S. L., Vernes, S. C., . . . Fisher, S. E. (2005). Identification of FOXP2 truncation as a novel cause of developmental speech and language deficits. *American Journal of Human Genetics*, *76*(6), 1074-1080.
- Marien, P., Brouns, R., Engelborghs, S., Wackenier, P., Verhoeven, J., Ceulemans, B., & De Deyn, P. P. (2008). Cerebellar cognitive affective syndrome without global mental retardation in two relatives with Gillespie syndrome. *Cortex: A Journal Devoted to the Study of the Nervous System and Behavior*, *44*(1), 54-67.
- Marignier, S., Lesca, G., Marguin, J., Bussy, G., Sanlaville, D., & des Portes, V. (2012). Childhood apraxia of speech without intellectual deficit in a patient with cri du chat syndrome. *European Journal of Medical Genetics*, *55*(6-7), 433-436.

- Marion, M. J., Sussman, H. M., & Marquardt, T. P. (1993). The Perception and Production of Rhyme in Normal and Developmentally Apraxic Children. *Journal of Communication Disorders*, 26(3), 129-160.
- Marquardt, T. P., Jacks, A., & Davis, B. L. (2004). Token-to-token variability in developmental apraxia of speech: Three longitudinal case studies. *Clinical Linguistics & Phonetics*, 18(2), 127-144.
- Marquardt, T. P., Sussman, H. M., Snow, T., & Jacks, A. (2002). The integrity of the syllable in developmental apraxia of speech. *Journal of Communication Disorders*, 35(1), 31-49.
- McCabe, P., Rosenthal, J. B., & McLeod, S. (1998). Features of developmental dyspraxia in the general speech-impaired population? *Clinical Linguistics & Phonetics*, 12(2), 105-126.
- McCormick, M. (2000). Dyslexia and developmental verbal dyspraxia. *Dyslexia: the Journal of the British Dyslexia Association*, 6(3), 210-214.
- McLaughlin, J. F., & Kriegsmann, E. (1980). Developmental Dyspraxia in a Family with X-linked Mental Retardation (Renpenning Syndrome). *Developmental Medicine & Child Neurology*, 22(1), 84-92.
- McNeill, B. (2015). Developmental verbal dyspraxia. In *The Cambridge Handbook of Communication Disorders* (pp. 49-60).
- McNeill, B., & Gillon, G. (2013). Expressive morphosyntactic development in three children with childhood apraxia of speech. *Speech, Language and Hearing*, 16(1), 9-17.
- Milloy, N., & Summers, L. (1989). Six years on — do claims still hold? Four children reassessed on a procedure to identify developmental articulatory dyspraxia. *Child Language Teaching and Therapy*, 5(3), 287-303.
- Mills, L., Gosling, A., & Sell, D. (2006). Extending the Communication Phenotype Associated with 22q11.2 Microdeletion Syndrome. *Advances in Speech-Language Pathology*, 8(1), 17-27.
- Murdoch, B. E., Attard, M. D., Ozanne, A. E., & Stokes, P. D. (1995). Impaired tongue strength and endurance in developmental verbal dyspraxia: a physiological analysis. *European Journal of Disorders of Communication*, 30(1), 51-64.
- Murray, E., Thomas, D., & McKechnie, J. (2018). Comorbid morphological disorder apparent in some children aged 4-5 years with childhood apraxia of speech: findings from standardised testing. *Clinical Linguistics & Phonetics*, 1-18.
- Namasivayam, A. K., Pukonen, M., Goshulak, D., Yu, V. Y., Kadis, D. S., Kroll, R., . . . De Nil, L. F. (2013). Relationship between speech motor control and speech intelligibility in children with speech sound disorders. *Journal of Communication Disorders*, 46(3), 264-280.
- Nelson, C. D., Waggoner, D. D., Donnell, G. N., Tuerck, J. M., & Buist, N. R. M. (1991). Verbal dyspraxia in treated galactosemia. *Pediatrics*, 88(2), 346-350.
- Newmeyer, A., Aylward, C., Akers, R., Ishikawa, K., Grether, S., deGrauw, T., . . . White, J. (2009). Results of the sensory profile in children with suspected childhood Apraxia of speech. *Physical and Occupational Therapy in Pediatrics*, 29(2), 203-218.
- Nijland, L., Maassen, B., & Der Meulen, S. v. (2003). Evidence of motor programming deficits in children diagnosed with DAS. *Journal of Speech, Language, and Hearing Research*, 46(2), 437-450.
- Nijland, L., Maassen, B., & van der Meulen, S. (2002). Speech motor subprocesses in DAS studied with a bite-block. In *Investigations in clinical phonetics and linguistics* (pp. 257-266). Mahwah, NJ: Lawrence Erlbaum Associates Publishers; US.

- Nijland, L., Terband, H., & Maassen, B. (2015). Cognitive functions in childhood apraxia of speech. *Journal of Speech, Language, and Hearing Research, 58*(3), 550-565.
- Nikoghosyan-Bossen, G. (2018). Oral and verbal dyspraxia in an otherwise healthy child. *Ugeskrift for laeger, 180*(9).
- Northam, G. B., Liegeois, F., Chong, W. K., Baker, K., Tournier, J.-D., Wyatt, J. S., . . . Morgan, A. (2012). Speech and oromotor outcome in adolescents born preterm: Relationship to motor tract integrity. *The Journal of Pediatrics, 160*(3), 402-408.
- Odell, K. H., & Shriberg, L. D. (2001). Prosody-voice characteristics of children and adults with apraxia of speech. *Clinical Linguistics & Phonetics, 15*(4), 275-307.
- Otten, M., & Walther, W. (2012). Therapy of prosodic abilities in developmental apraxia of speech - A case study. *Forum Logopadie, 26*(2), 16-21.
- Overby, M., & Caspari, S. S. (2015). Volubility, consonant, and syllable characteristics in infants and toddlers later diagnosed with childhood apraxia of speech: A pilot study. *Journal of Communication Disorders, 55*(Jun), 44-62.
- Pal, D., Li, W., Clarke, T., Lieberman, P., & Strug, L. (2010). Pleiotropic effects of the 11p13 locus on developmental verbal dyspraxia and EEG centrottemporal sharp waves. *Genes, Brain & Behavior, 9*(8), 1004-1012.
- Pal, D. K. (2011). Epilepsy and neurodevelopmental disorders of language. *Current Opinion in Neurology, 24*(2), 126-131.
- Palka, C., Alfonsi, M., Mohn, A., Cerbo, R., Guanciali Franchi, P., Fantasia, D., . . . Palka, G. (2012). Mosaic 7q31 deletion involving FOXP2 gene associated with language impairment. *Pediatrics, 129*(1), e183-188.
- Park, J., & Byeon, H. (2015). Variability and duration of voice onset time in childhood apraxia of speech in Korea: Results of the spectrum study. *International Journal of Bio-Science and Bio-Technology, 7*(4), 67-76.
- Patel, R., & Connaghan, K. (2014). Park Play: A picture description task for assessing childhood motor speech disorders. *International Journal of Speech-Language Pathology, 16*(4), 337-343.
- Peter, B. (2012). Oral and Hand Movement Speeds are Associated with Expressive Language Ability in Children with Speech Sound Disorder. *Journal of Psycholinguistic Research, 41*(6), 455-474.
- Peter, B., Button, L., Stoel-Gammon, C., Chapman, K., & Raskind, W. H. (2013). Deficits in sequential processing manifest in motor and linguistic tasks in a multigenerational family with childhood apraxia of speech. *Clinical Linguistics & Phonetics, 27*(3), 163-191.
- Peter, B., Matsushita, M., Oda, K., & Raskind, W. (2014). De novo microdeletion of BCL11A is associated with severe speech sound disorder. *American Journal of Medical Genetics, Part A, 164*(8), 2091-2096.
- Peter, B., & Raskind, W. H. (2011). Evidence for a Familial Speech Sound Disorder Subtype in a Multigenerational Study of Oral and Hand Motor Sequencing Ability. *Topics in Language Disorders, 31*(2), 145-167. doi:10.1097/0b013e318217b855
- Peter, B., & Stoel-Gammon, C. (2005). Timing Errors in Two Children with Suspected Childhood Apraxia of Speech (sCAS) during Speech and Music-Related Tasks. *Clinical Linguistics & Phonetics, 19*(2), 67-87.
- Peter, B., & Stoel-Gammon, C. (2008). Central timing deficits in subtypes of primary speech disorders. *Clinical Linguistics & Phonetics, 22*(3), 171-198.

- Peter, B., Wijsman, E. M., Nato, A. Q., Jr., University of Washington Center for Mendelian, G., Matsushita, M. M., Chapman, K. L., . . . Shendure, J. (2016). Genetic candidate variants in two multigenerational families with childhood apraxia of speech. *PLoS ONE*, *11*(4).
- Pierpont, E. I., Weismer, S. E., Roberts, A. E., Tworog-Dube, E., Pierpont, M. E., Mendelsohn, N. J., & Seidenberg, M. S. (2010). The Language Phenotype of Children and Adolescents With Noonan Syndrome. *Journal of Speech, Language, and Hearing Research*, *53*(4), 917-932.
- Polan, M. B., Pastore, M. T., Steingass, K., Hashimoto, S., Thrush, D. L., Pyatt, R., . . . McBride, K. L. (2014). Neurodevelopmental disorders among individuals with duplication of 4p13 to 4p12 containing a GABA A receptor subunit gene cluster. *European Journal of Human Genetics*, *22*(1), 105-109.
- Polivara, Z. V. (2015). Neurolinguistic aspects of verbal activity research of bilingual children with speech dysfunctions. *Mediterranean Journal of Social Sciences*, *6*(36), 341-346.
- Pollock, K. E., & Hall, P. K. (1991). An Analysis of the Vowel Misarticulations of Five Children with Developmental Apraxia of Speech. *Clinical Linguistics & Phonetics*, *5*(3), 207-224.
- Poretti, A., Hausler, M., von Moers, A., Baumgartner, B., Zerres, K., Klein, A., . . . Boltshauser, E. (2014). Ataxia, intellectual disability, and ocular apraxia with cerebellar cysts: A new disease? *The Cerebellum*, *13*(1), 79-88.
- Posod, M. N. (2013). *Using optimality theory to identify rule-based variability in a child with suspected childhood apraxia of speech: A single-subject case study.* (AAI1523088), Masters Dissertation, University of California. Retrieved from Linguistics and Language Behavior Abstracts (LLBA) database.
- Prater, S. N., Banugaria, S. G., DeArme, S. M., Botha, E. G., Stege, E. M., Case, L. E., . . . Kishnani, P. S. (2012). The emerging phenotype of long-term survivors with infantile Pompe disease. *Genetics in Medicine*, *14*(9), 800-810.
- Preston, J. L., Molfese, P. J., Gumkowski, N., Sorcinelli, A., Harwood, V., Irwin, J. R., & Landi, N. (2014). Neurophysiology of speech differences in childhood apraxia of speech. *Developmental Neuropsychology*, *39*(5), 385-403.
- Rabin, R., Millan, F., Cabrera-Luque, J., & Pappas, J. (2018). Intellectual disability due to monoallelic variant in GATAD2B and mosaicism in unaffected parent. *American Journal of Medical Genetics, Part A*, *176*(12), 2907-2910.
- Raca, G., Baas, B. S., Kirmani, S., Laffin, J. J., Jackson, C. A., Strand, E. A., . . . Shriberg, L. D. (2013). Childhood Apraxia of Speech (CAS) in two patients with 16p11.2 microdeletion syndrome. *European Journal of Human Genetics*, *21*(4), 455-459.
- Rasmussen, R. K., Andreassen, A. B., Stromme, P., & Hansen, T. W. (1996). Learning disabilities and language pathology in patients with galactosemia. *Logopedics, Phoniatrics, Vocology*, *21*(3-4), 157-162.
- Redle, E., Vannest, J., Maloney, T., Tsevat, R. K., Eikenberry, S., Lewis, B., . . . Holland, S. K. (2015). Functional MRI evidence for fine motor praxis dysfunction in children with persistent speech disorders. *Brain Research*, *1597*(Feb), 47-56.
- Robertson, A., Singh, R. H., Guerrero, N. V., Hundley, M., & Elsas, L. J. (2000). Outcomes analysis of verbal dyspraxia in classic galactosemia. *Genetics in Medicine*, *2*(2), 142-148.
- Rosenbek, J. (1980). Apraxia of Speech-Relationship to Stuttering. *Journal of Fluency Disorders*, *5*(3), 233-253.
- Rosenbek, J. C., & Wertz, R. T. (1972). A review of fifty cases of developmental apraxia of speech. *Language, Speech, and Hearing Services in Schools*, *3*(1), 23-33.

- Samango-Sprouse, C., Lawson, P., Sprouse, C., Stapleton, E., Sadeghin, T., & Gropman, A. (2016). Expanding the phenotypic profile of Kleefstra syndrome: A female with low-average intelligence and childhood apraxia of speech. *American Journal of Medical Genetics. Part A*, *170A*(5), 1312-1316.
- Samango-Sprouse, C., & Rogol, A. (2002). XXY: The Hidden Disability and a Prototype for an Infantile Presentation of Developmental Dyspraxia (IDD). *Infants and Young Children*, *15*(1), 11-18.
- Scheffer, I. E., Jones, L., Pozzebon, M., Howell, R., Saling, M. M., & Berkovic, S. F. (1995). Autosomal dominant rolandic epilepsy and speech dyspraxia: A new syndrome with anticipation. *Annals of Neurology*, *38*(4), 633-642.
- Schumacher, J., Strand, K. E., & Augustyn, M. (2015). Apraxia, autism, attention-deficit hyperactivity disorder: Do we have a new spectrum? *Journal of Developmental and Behavioral Pediatrics*, *36*(2), 124-126.
- Sealey, L. R., & Giddens, C. L. (2010). Aerodynamic indices of velopharyngeal function in childhood apraxia of speech. *Clinical Linguistics & Phonetics*, *24*(6), 417-430.
- Sengoku, A., Kanazawa, O., Fujitake, J., Kawai, I., & Yamaguchi, T. (1985). A Case of Epilepsy with Developmental Dysphasia Due to Bucco-Facial Apraxia. *Journal of the Japan Epilepsy Society*, *3*(2), 124-132.
- Shahin, M., Ahmed, B., Parnandi, A., Karappa, V., McKechnie, J., Ballard, K. J., & Gutierrez-Osuna, R. (2015). Tabby Talks: An automated tool for the assessment of childhood apraxia of speech. *Speech Communication*, *70*, 49-64.
- Shelton, J. O. (2002). Distinctive error profiles and segmental inconsistency within developmental verbal/speech apraxia. *Dissertation Abstracts International: Section B: The Sciences and Engineering*, *63*(1-B), 216.
- Shriberg, L. D. (2012). A neurodevelopmental framework for research in childhood apraxia of speech. In *Speech Motor Control: New Developments in Basic and Applied Research*.
- Shriberg, L. D., Ballard, K. J., Tomblin, J., Duffy, J. R., Odell, K. H., & Williams, C. A. (2006). Speech, prosody, and voice characteristics of a mother and daughter with a 7;13 translocation affecting FOXP2. *Journal of Speech, Language, and Hearing Research*, *49*(3), 500-525.
- Shriberg, L. D., & et al. (1997). Developmental Apraxia of Speech: III. A Subtype Marked by Inappropriate Stress. *Journal of Speech, Language, and Hearing Research*, *40*(2), 313-337.
- Shriberg, L. D., Fourakis, M., Hall, S. D., Karlsson, H. B., Lohmeier, H. L., McSweeney, J. L., . . . Wilson, D. L. (2010). Perceptual and acoustic reliability estimates for the Speech Disorders Classification System (SDCS). *Clinical Linguistics & Phonetics*, *24*(10), 825-846.
- Smith, M. L. (2004). *Naming and Rhyme Recognition Abilities in Children Diagnosed with Childhood Apraxia of Speech*. Dissertation retrieved from Linguistics and Language Behavior Abstracts (LLBA) database.
- Snowling, M. J., & Stackhouse, J. (1983). Spelling performance of children with developmental verbal dyspraxia. *Developmental Medicine & Child Neurology*, *25*(4), 430-437.
- Soblet, J., Dimov, I., Graf von Kalckreuth, C., Cano-Chervel, J., Baijot, S., Pelc, K., . . . Deconinck, N. (2018). BCL11A frameshift mutation associated with dyspraxia and hypotonia affecting the fine, gross, oral, and speech motor systems. *American Journal of Medical Genetics. Part A*, *176*(1), 201-208.

- Sorensen, D. N. (1997). A Case Study of a Child with Agenesis of the Corpus Callosum. *American Journal of Speech-Language Pathology*, 6(3), 36-44.
- Speirs, R. L., & Dean, P. M. (1989). Toffee clearance and lingual sensory and motor activities in normal children and in children with articulation problems of speech. *Archives of Oral Biology*, 34(8), 637-644.
- Spinelli, M., Rocha, A. C. D. O., Giacheti, C. M., & Richieri-Costa, A. (1995). Word-finding difficulties, verbal paraphasias, and verbal dyspraxia in ten individuals with fragile X syndrome. *American Journal of Medical Genetics - Neuropsychiatric Genetics*, 60(1), 39-43.
- Stackhouse, J. (1992). Developmental verbal dyspraxia: A longitudinal case study. In *Mental lives: Case studies in cognition* (pp. 84-98). Malden: Blackwell Publishing.
- Stackhouse, J., & Snowling, M. (1992). Developmental Verbal Dyspraxia II: A Developmental Perspective on Two Case Studies. *European Journal of Disorders of Communication*, 27(1), 35-54.
- Sussman, H. M., Marquardt, T. P., & Doyle, J. (2000). An Acoustic Analysis of Phonemic Integrity and Contrastiveness in Developmental Apraxia of Speech. *Journal of Medical Speech-Language Pathology*, 8(4), 301-313.
- Sussman, H. M., Marquardt, T. P., Doyle, J., & Knapp, H. (2002). Phonemic integrity and contrastiveness in developmental apraxia of speech. In *Investigations in Clinical Phonetics and Linguistics* (pp. 311-326). Mahwah, NJ: Lawrence Erlbaum Associates Publishers; US.
- Tate, M. (1990). Developmental Dyspraxia of Speech: A Longitudinal Study. *Journal of the British Association of the Teachers of the Deaf*, 14(1), 16-22.
- Terband, H., van Brenk, F., & van Doornik-van der Zee, A. (2014). Auditory feedback perturbation in children with developmental speech sound disorders. *Journal of Communication Disorders*, 51, 64-77. doi:10.1016/j.jcomdis.2014.06.009
- Thevenon, J., Callier, P., Andrieux, J., Delobel, B., David, A., Sukno, S., . . . Faivre, L. (2013). 12p13.33 microdeletion including ELKS/ERC1, a new locus associated with childhood apraxia of speech. *European Journal of Human Genetics*, 21(1), 82-88.
- Thomas, A. (2014). Word learning effects on speech motor performance in children with CAS. *Dissertation Abstracts International: Section B: The Sciences and Engineering*, 74(11-B(E)), No Pagination Specified.
- Thoonen, G., & et al. (1994). Feature Analysis of Singleton Consonant Errors in Developmental Verbal Dyspraxia (DVD). *Journal of Speech and Hearing Research*, 37(6), 1424-1440.
- Thoonen, G., Maassen, B., Gabreëls, F., Schreuder, R., & De Swart, B. (1997). Towards a standardised assessment procedure for developmental apraxia of speech. *International Journal of Language and Communication Disorders*, 32(1), 37-60.
- Tierney, C., Mayes, S., Lohs, S. R., Black, A., Gisin, E., & Veglia, M. (2015). How valid is the Checklist for Autism Spectrum Disorder when a child has apraxia of speech? *Journal of Developmental and Behavioral Pediatrics*, 36(8), 569-574.
- Togram, B. (2015). How do families of children with Down syndrome perceive speech intelligibility in Turkey? *BioMed Research International*, 2015, 707134.
- Tubul-Lavy, G. (2012). Intra-word inconsistency in apraxic Hebrew-speaking children. *Clinical Linguistics & Phonetics*, 26(6), 502-517.

- Tükel, S., Björelid, H., Henningsson, G., McAllister, A., & Eliasson, A. C. (2015). Motor functions and adaptive behaviour in children with childhood apraxia of speech. *International Journal of Speech-Language Pathology*, *17*(5), 470.
- Turner, S. J., Hildebrand, M. S., Block, S., Damiano, J., Fahey, M., Reilly, S., . . . Morgan, A. T. (2013). Small intragenic deletion in FOXP2 associated with childhood apraxia of speech and dysarthria. *American Journal of Medical Genetics. Part A*, *161A*(9), 2321-2326.
- van der Merwe, A., Uys, I. C., Loots, J. M., Grimbeek, R. J., & Jansen, L. P. (1989). [The influence of certain contextual factors on voice onset time, vowel duration and utterance duration in verbal apraxia]. *South African Journal of Communication Disorders - die Suid-Afrikaanse Tydskrif vir Kommunikasieafwykings*, *36*, 29-41.
- Van Uden, A. M. J. (1981). Early Diagnosis of Those Multiple Handicaps in Prelingually Profoundly Deaf Children Which Endanger an Education According to the Purely Oral Way. *The Teacher of the Deaf*, *5*(4), 112-127.
- Vargas, L., & Narbona, J. (2002). Congenital ocular motor apraxia and learning disabilities: Reflections on 6 patients. *Acta Paediatrica Espanola*, *60*(11), 669-674.
- Vernes, S. C., MacDermot, K. D., Monaco, A. P., & Fisher, S. E. (2009). Assessing the impact of FOXP1 mutations on developmental verbal dyspraxia. *European Journal of Human Genetics*, *17*(10), 1354-1358.
- Vernes, S. C., Nicod, J., Elahi, F. M., Coventry, J. A., Kenny, N., Coupe, A. M., . . . Fisher, S. E. (2006). Functional genetic analysis of mutations implicated in a human speech and language disorder. *Human Molecular Genetics*, *15*(21), 3154-3167.
- Vose, C. (2018). Genetic variations and associated electrophysiological and behavioral traits in children with childhood apraxia of speech. *Dissertation Abstracts International: Section B: The Sciences and Engineering*, *79*(10-B(E)), No Pagination Specified.
- Waisbren, S. E., Potter, N. L., Gordon, C. M., Green, R. C., Greenstein, P., Gubbels, C. S., . . . Berry, G. T. (2012). The adult galactosemic phenotype. *Journal of Inherited Metabolic Disease*, *35*(2), 279-286.
- Walton, J. H., & Pollock, K. E. (1993). Acoustic Validation of Vowel Error Patterns in Developmental Apraxia of Speech. *Clinical Linguistics & Phonetics*, *7*(2), 95-111.
- Watkins, K. E., Dronkers, N. F., & Vargha-Khadem, F. (2002). Behavioural analysis of an inherited speech and language disorder: comparison with acquired aphasia. *Brain*, *125*(Pt 3), 452-464.
- Watkins, K. E., Vargha-Khadem, F., Ashburner, J., Passingham, R. E., Connelly, A., Friston, K. J., . . . Gadian, D. G. (2002). MRI analysis of an inherited speech and language disorder: structural brain abnormalities. *Brain*, *125*(Pt 3), 465-478.
- Weistuch, L., & Schiff-Myers, N. B. (1996). Chromosomal translocation in a child with SLI and apraxia. *Journal of Speech & Hearing Research*, *39*(3), 668-671.
- Wertzner, H. F., Pagan-Neves, L. O., Alves, R. R., & Barrozo, T. F. (2013). Implications of diadochokinesia in children with speech sound disorder. *CODAS*, *25*(1), 52-58.
- Whaley, P. (1985). Three Subgroups of Preschool Children with Speech Intelligibility Disorders. *Resources in Education*, *21*. No Pagination Specified.
- Wiley, S., Choo, D., Meinzen-Derr, J., Hilbert, L., & Greinwald, J. (2006). GJB2 mutations and additional disabilities in a pediatric cochlear implant population. *International Journal of Pediatric Otorhinolaryngology*, *70*(3), 493-500.
- Wilson, M., & Dyson, A. (1982). Noonan Syndrome: Speech and Language Characteristics. *Journal of Communication Disorders*, *15*(5), 347-352.

- Worthey, E. A., Raca, G., Laffin, J. J., Wilk, B. M., Harris, J. M., Jakielski, K. J., . . . Shriberg, L. D. (2013). Whole-exome sequencing supports genetic heterogeneity in childhood apraxia of speech. *Journal of Neurodevelopmental Disorders*, *5*(1), 29.
- Zerem, A., Vinkler, C., Michelson, M., Leshinsky-Silver, E., Lerman-Sagie, T., & Lev, D. (2011). Mosaic marker chromosome 16 resulting in 16q11.2-q12.1 gain in a child with intellectual disability, microcephaly, and cerebellar cortical dysplasia. *American Journal of Medical Genetics. Part A*, *155A*(12), 2991-2996.
